# Supplementary material for: Chloroplast Genome Evolution and Species Identification of Styrax (Styracaceae)
Source: Hindawi journal article supplement (doi:10.1155/2022/5364094), 2022-01-01

Chloroplast genome evolution and species identification of *Styrax*  
(Styracaceae)

Yun Song<sup>1,2\*</sup>, Wenjun Zhao<sup>1</sup>, Jin Xu<sup>1,2</sup>, MingFu Li<sup>1,2\*</sup>, Yongjiang Zhang<sup>1</sup>

<sup>1</sup>Institute of Plant Inspection and Quarantine, Chinese Academy of Inspection and Quarantine  
(CAIQ), Beijing 100176, China,

<sup>2</sup>CAIQ center for Biosafety, Sanya 572025, China,

\* Corresponding author

E-mail: sydef1016@163.com, limf9@sina.com

Table S1. Taxa included in this study with locality, voucher, and GenBank accession numbers. The bold font samples were sequenced in this study.

Table S2. Summary of the sequencing data for 17 *Styrax* samples.

Table S3. The information of small inversions.

Table S4. The primers used for amplification the specific *Styrax* DNA barcodes.

Figure S1. Visualization of genome alignment of the *Styrax* chloroplast genomes. The x-axis showed the coordinate between the chloroplast genome.

Figure S1. Visualization of genome alignment of the *Styrax* chloroplast genomes. The x-axis showed the coordinate between the chloroplast genome.

Table S1. Taxa included in this study with locality, voucher, and GenBank accession numbers.

| Taxon                         | Locality                                                          | Preservation | Accession number of plastome | Voucher     |
|-------------------------------|-------------------------------------------------------------------|--------------|------------------------------|-------------|
| <i>Styrax agrestis</i> 01     | Ledong, Hainan, China                                             | Silicagel    | MZ285735                     | SY850806    |
| <i>Styrax agrestis</i> 02     | Ledong, Hainan, China                                             | N/A          | MT644192                     | NF2020090   |
| <i>Styrax americanus</i>      | Kankakee County, Illinois, USA                                    | Herbarium    | MZ285749                     | PE01618866  |
| <i>Styrax argenteus</i>       | Guanacaste Liberia Area de Conversacion<br>Guanacaste, Costa Rica | Herbarium    | MZ285745                     | PE02110301  |
| <i>Styrax calvescens</i>      | Huangshan, Anhui, China                                           | N/A          | MN560141                     | NF2019468   |
| <i>Styrax casearifolius</i>   | Jianghong, Yunnan, China                                          | Silicagel    | MZ285737                     | SY850801    |
| <i>Styrax chinensis</i>       | Nanning, Guangxi, China                                           | N/A          | MT648752                     | NF2020091   |
| <i>Styrax confusus</i>        | Huangshan, in Anhui, China                                        | N/A          | MN560142                     | NF2019903   |
| <i>Styrax dasyanthus</i>      | Luhe District, Nanjing, China                                     | N/A          | MN329776                     | NF2018097   |
| <i>Styrax duclouxii</i>       | Nanjing, Jiangsu, China                                           | N/A          | MN882545                     | NF2019128   |
| <i>Styrax faberi</i>          | Qiyun, Anhui, China                                               | N/A          | MN335255                     | NF2018669   |
| <i>Styrax formosanus</i>      | Nantou, Taiwan, China                                             | Herbarium    | MZ285742                     | PE01883300  |
| <i>Styrax grandiflorus</i> 01 | N/A                                                               | N/A          | KX111381                     | F365        |
| <i>Styrax grandiflorus</i> 02 | N/A                                                               | N/A          | MF179493                     | 14CS8610    |
| <i>Styrax hemsleyanus</i>     | Lushi, Henan, China                                               | Silicagel    | MZ285748                     | SY850797    |
| <i>Styrax huanus</i>          | Nanchuan, Sichuan, China                                          | Silicagel    | MZ285741                     | SY850798    |
| <i>Styrax japonicus</i>       | Yuanqu, Shanxi, China                                             | Silicagel    | MZ285743                     | SY850800    |
| <i>Styrax macrocarpus</i>     | Yizhang, Hunan, China                                             | N/A          | MT435525                     | DG-2019-002 |

|                               |                                      |           |          |              |
|-------------------------------|--------------------------------------|-----------|----------|--------------|
| <i>Styrax obassia</i> 01      | Jinzai, Anhui, China                 | Silicagel | MZ285733 | SY850795     |
| <i>Styrax obassia</i> 02      | Nanjing, Jiangsu, China              | N/A       | MN560143 | NF2019061    |
| <i>Styrax odoratissimus</i>   | Huangshan, Anhui, China              | N/A       | MN368610 | NF2018038    |
| <i>Styrax perkinsiae</i>      | Fugong, Yunnan, China                | Silicagel | MZ285734 | SY850793     |
| <i>Styrax ramirezii</i>       | N/A                                  | N/A       | MG719843 | N/A          |
| <i>Styrax roseus</i>          | Leibo, Sichuan, China                | Silicagel | MZ285736 | SY850792     |
| <i>Styrax rugosus</i>         | Jingdong, Yuannan, China             | Silicagel | MZ285746 | SY850791     |
| <i>Styrax serrulatus</i>      | Kachin State Putao District, Myanmar | Herbarium | MZ285738 | PE02037081   |
| <i>Styrax suberifolius</i> 01 | Jianggangshan, Jiangxi, China        | Silicagel | MZ285747 | SY850789     |
| <i>Styrax suberifolius</i> 02 | N/A                                  | N/A       | MG719828 | N/A          |
| <i>Styrax tonkinensis</i> 01  | Luhe, Nanjing, Jiangsu               | N/A       | MT075718 | NF2019868    |
| <i>Styrax tonkinensis</i> 02  | Nanyue, Hunan, China                 | Silicagel | MZ285740 | SY850788     |
| <i>Styrax tonkinensis</i> 03  | Suining, Hunan, China                | Silicagel | MZ285739 | SY850799     |
| <i>Styrax tonkinensis</i> 04  | Xinning, Hunan, China                | Silicagel | MZ285744 | SY850803     |
| <i>Styrax wuyuanensis</i>     | Wuyuan, Jiangxi, China               | N/A       | MW166213 | JXAU 2020026 |
| <i>Styrax zhejiangensis</i>   | N/A                                  | N/A       | MG702338 | N/A          |

---

Table S2. Summary of the sequencing data for 17 *Styrax* samples.

| Species                       | Clean data no. | Mapped reads no. | Mapped to reference genome (%) | Chloroplast genome coverage (X) |
|-------------------------------|----------------|------------------|--------------------------------|---------------------------------|
| <i>Styrax agrestis</i> 01     | 25487458       | 316904           | 1.24                           | 301.10597                       |
| <i>Styrax americanus</i>      | 12864020       | 67059            | 0.52                           | 63.733795                       |
| <i>Styrax argenteus</i>       | 24107816       | 626810           | 2.60                           | 594.03886                       |
| <i>Styrax casearifolius</i>   | 32517270       | 258037           | 0.79                           | 245.07731                       |
| <i>Styrax formosanus</i>      | 20748168       | 504977           | 2.43                           | 479.24778                       |
| <i>Styrax hemsleyanus</i>     | 23759700       | 85455            | 0.36                           | 81.141003                       |
| <i>Styrax huanus</i>          | 19975582       | 460290           | 2.30                           | 437.21385                       |
| <i>Styrax japonicus</i>       | 11971102       | 718402           | 6.00                           | 683.58041                       |
| <i>Styrax obassia</i> 01      | 23055492       | 984696           | 4.27                           | 935.3767                        |
| <i>Styrax perkinsiae</i>      | 24176372       | 450934           | 1.87                           | 428.61732                       |
| <i>Styrax roseus</i>          | 23868728       | 1702907          | 7.13                           | 1617.6463                       |
| <i>Styrax rugosus</i>         | 40957798       | 204338           | 0.50                           | 193.68653                       |
| <i>Styrax serrulatus</i>      | 32674632       | 91391            | 0.28                           | 86.818556                       |
| <i>Styrax suberifolius</i> 01 | 22828072       | 130990           | 0.57                           | 123.3172                        |
| <i>Styrax tonkinensis</i> 02  | 27165452       | 100781           | 0.37                           | 95.643055                       |
| <i>Styrax tonkinensis</i> 03  | 31683486       | 680905           | 2.15                           | 646.55975                       |
| <i>Styrax tonkinensis</i> 04  | 32586122       | 92366            | 0.28                           | 87.493764                       |

Table S3. The information of small inversions.

|                           | trnS <sup>GCU</sup> - | atpF - |       | trnC <sup>GCA</sup> - | petN- | trnS <sup>UGA</sup> - | trnS <sup>GGA</sup> | ycf3-                  | trnT <sup>UGU</sup> - | trnF <sup>GAA</sup> - | trnF <sup>GAA</sup> - | trnF <sup>GAA</sup> - | petA- | psaJ- |      | trnR <sup>ACG</sup> - |                     |
|---------------------------|-----------------------|--------|-------|-----------------------|-------|-----------------------|---------------------|------------------------|-----------------------|-----------------------|-----------------------|-----------------------|-------|-------|------|-----------------------|---------------------|
|                           | trnG <sup>GCC</sup>   | atpH   | rpoC1 | petN                  | psbM  | psbZ                  | 01                  | trnS <sup>GGA</sup> 02 | trnL <sup>UAA</sup>   | ndhJ 01               | ndhJ 02               | ndhJ 03               | psbJ  | rpl33 | clpP | trnI <sup>GAU</sup>   | trnN <sup>GUU</sup> |
| <i>S. agrestis</i> 01     | yes                   |        |       |                       |       |                       |                     |                        |                       |                       |                       |                       |       |       |      |                       |                     |
| <i>S. agrestis</i> 02     |                       |        |       |                       |       |                       |                     |                        |                       |                       |                       |                       |       | yes   |      |                       |                     |
| <i>S. americanus</i>      |                       |        |       |                       |       |                       |                     | yes                    |                       |                       |                       | yes                   |       | yes   |      |                       |                     |
| <i>S. argenteus</i>       |                       |        |       |                       |       |                       |                     |                        |                       |                       |                       | yes                   | yes   | yes   |      |                       |                     |
| <i>S. calvescens</i>      |                       | yes    |       |                       |       |                       |                     | yes                    |                       |                       |                       |                       |       | yes   |      |                       |                     |
| <i>S. casearifolius</i>   |                       |        |       |                       |       |                       |                     | yes                    |                       |                       |                       |                       |       | yes   |      |                       |                     |
| <i>S. chinensis</i>       |                       |        | yes   |                       |       | yes                   |                     | yes                    |                       |                       |                       | yes                   | yes   | yes   |      |                       |                     |
| <i>S. confusus</i>        |                       | yes    |       |                       |       |                       |                     | yes                    |                       |                       |                       |                       |       | yes   |      |                       |                     |
| <i>S. dasyanthus</i>      |                       | yes    |       |                       |       |                       |                     |                        |                       |                       |                       |                       |       | yes   |      | yes                   |                     |
| <i>S. duclouxii</i>       |                       |        |       | yes                   |       |                       |                     | yes                    |                       |                       |                       |                       |       | yes   |      |                       |                     |
| <i>S. faberi</i>          |                       |        |       |                       |       |                       |                     |                        |                       |                       |                       |                       |       | yes   |      |                       |                     |
| <i>S. formosanus</i>      |                       | yes    |       |                       |       |                       |                     | yes                    |                       |                       |                       |                       |       | yes   |      |                       |                     |
| <i>S. grandiflorus</i> 01 |                       | yes    |       |                       |       |                       |                     |                        |                       |                       |                       |                       |       | yes   |      |                       |                     |
| <i>S. grandiflorus</i> 02 |                       | yes    |       |                       |       |                       |                     |                        |                       |                       |                       |                       |       | yes   |      |                       |                     |
| <i>S. hemsleyanus</i>     |                       |        |       |                       |       |                       |                     |                        |                       |                       |                       |                       |       | yes   |      |                       |                     |
| <i>S. huanus</i>          |                       |        |       |                       |       |                       |                     |                        |                       |                       |                       |                       |       | yes   |      | yes                   |                     |
| <i>S. japonicus</i>       |                       | yes    |       |                       |       |                       |                     | yes                    |                       |                       |                       |                       |       | yes   |      |                       |                     |
| <i>S. macrocarpus</i>     |                       |        |       |                       |       |                       |                     | yes                    |                       |                       |                       |                       |       | yes   |      |                       |                     |
| <i>S. obassia</i> 01      |                       |        |       |                       | yes   |                       |                     | yes                    |                       | yes                   |                       | yes                   |       | yes   |      |                       |                     |

|                    |     |     |     |     |     |     |  |     |     |         |
|--------------------|-----|-----|-----|-----|-----|-----|--|-----|-----|---------|
| S. obassia 02      |     | yes |     | yes |     | yes |  | yes |     | yes     |
| S. odoratissimus   |     |     |     |     |     |     |  |     | yes | yes yes |
| S. perkinsiae      |     |     | yes | yes |     |     |  | yes | yes |         |
| S. ramirezii       | yes |     |     | yes | yes |     |  | yes | yes | yes     |
| S. roseus          |     |     |     |     |     |     |  |     | yes |         |
| S. rugosus         |     |     |     | yes |     |     |  | yes | yes |         |
| S. serrulatus      |     |     |     | yes |     |     |  |     | yes |         |
| S. suberifolius 01 | yes |     | yes | yes |     |     |  | yes | yes | yes     |
| S. suberifolius 02 | yes |     | yes | yes |     |     |  | yes | yes | yes     |
| S. tonkinensis 02  |     |     |     | yes |     |     |  | yes | yes |         |
| S. tonkinensis 03  |     | yes |     | yes |     |     |  | yes | yes |         |
| S. tonkinensis 04  |     | yes |     | yes |     |     |  | yes | yes |         |
| S. tonkinensis 01  | yes |     |     | yes |     |     |  | yes | yes |         |
| S. wuyuanensis     | yes |     |     | yes |     | yes |  |     | yes |         |
| S. zhejiangensis   |     |     |     | yes |     |     |  |     | yes |         |

---

Table S4. The primers used for amplification the specific *Styrax* DNA barcodes.

| Markers          | Forward     |                          | Reverse primer | Primer sequence 5' to 3' |
|------------------|-------------|--------------------------|----------------|--------------------------|
|                  | primer      | Primer sequence 5' to 3' |                |                          |
| <i>trnT-trnL</i> | trnT-trnL-f | TAGGAATTTAATAAACTATT     | trnT-trnL-r    | GCTTTAAAATTAGGATCTCATTG  |
| <i>ycf1b</i>     | ycf1b-f     | TCTTTTACTATCCAGTTTCGAA   | ycf1b-r        | TGGTTTGAAAAACCTCTTGTAAC  |



Figure S1. Visualization of genome alignment of the *Styrax* chloroplast genomes. The x-axis showed the coordinate between the chloroplast genome.

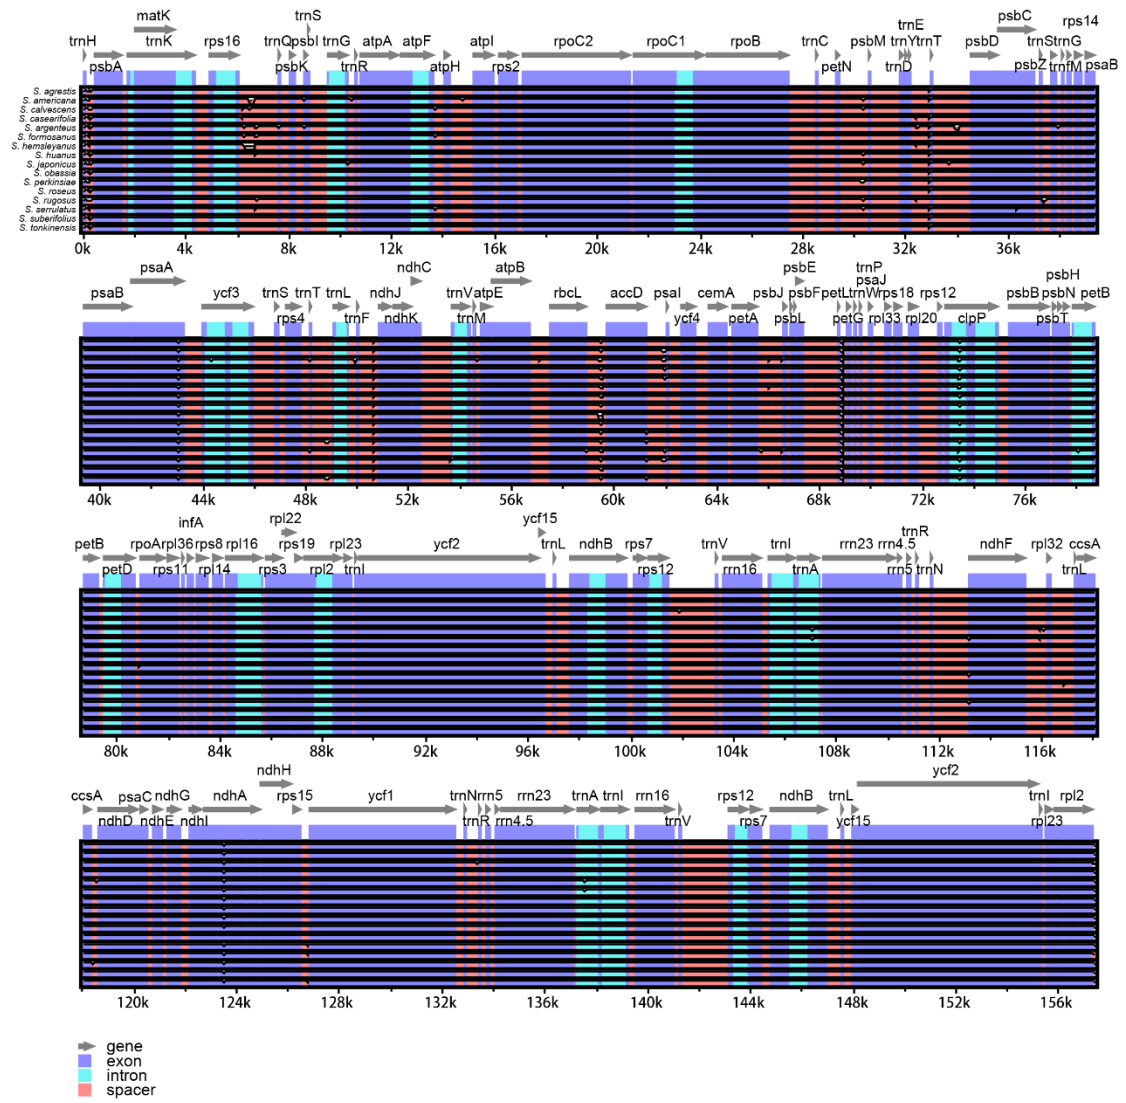

Supplement: f1 [file 5364094.f1.pdf]
